# Supplementary material for: Future directions for reducing inequity and maximising impact of child health strategies
Source: PubMed Central journal article supplement (PMC6283368; doi:10.1136/bmj.k2684), 2018-07-30
Supplement: dals042256.ww3.pdf [file dals042256.ww3.pdf]

## iCCM care-seeking for pneumonia

| ISO | Country                   | Level of implementation | Survey 1 |        | Survey 2 |        |
|-----|---------------------------|-------------------------|----------|--------|----------|--------|
|     |                           |                         | Year     | Source | Year     | Source |
| ARM | Armenia                   | >=50%                   | 2010     | DHS    |          |        |
| BDI | Burundi                   | <50%                    | 2010     | DHS    |          |        |
| BEN | Benin                     | >=50%                   | 2011     | DHS    |          |        |
| BFA | Burkina_Faso              | >=50%                   | 2010     | DHS    |          |        |
| BGD | Bangladesh                | >=50%                   | 2011     | DHS    | 2012     | MICS   |
| CIV | Cote_dIvoire              | >=50%                   | 2011     | DHS    |          |        |
| CMR | Cameroon                  | <50%                    | 2011     | DHS    |          |        |
| COD | Congo_Democratic_Republic | >=50%                   | 2010     | MICS   | 2013     | DHS    |
| COG | Congo_Brazzaville         | <50%                    | 2011     | DHS    |          |        |
| COL | Colombia                  | <50%                    | 2010     | DHS    |          |        |
| COM | Comoros                   | <50%                    | 2012     | DHS    |          |        |
| CUB | Cuba                      | >=50%                   | 2010     | MICS   | 2014     | MICS   |
| DOM | Dominican_Republic        | <50%                    | 2013     | DHS    |          |        |
| EGY | Egypt                     | <50%                    | 2014     | DHS    |          |        |
| ETH | Ethiopia                  | >=50%                   | 2011     | DHS    |          |        |
| GHA | Ghana                     | >=50%                   | 2011     | MICS   | 2014     | DHS    |
| GIN | Guinea                    | >=50%                   | 2012     | DHS    |          |        |
| GMB | Gambia                    | >=50%                   | 2013     | DHS    |          |        |
| HTI | Haiti                     | <50%                    | 2012     | DHS    |          |        |
| IDN | Indonesia                 | <50%                    | 2012     | DHS    |          |        |
| KHM | Cambodia                  | <50%                    | 2010     | DHS    | 2014     | DHS    |
| LAO | Lao                       | <50%                    | 2011     | MICS   |          |        |
| LBR | Liberia                   | <50%                    | 2013     | DHS    |          |        |
| MLI | Mali                      | >=50%                   | 2012     | DHS    |          |        |
| MOZ | Mozambique                | >=50%                   | 2011     | DHS    |          |        |
| MWI | Malawi                    | >=50%                   | 2010     | DHS    | 2013     | MICS   |
| NER | Niger                     | >=50%                   | 2012     | DHS    |          |        |
| NGA | Nigeria                   | <50%                    | 2011     | MICS   | 2013     | DHS    |
| NPL | Nepal                     | >=50%                   | 2011     | DHS    | 2014     | MICS   |
| PAK | Pakistan                  | <50%                    | 2012     | DHS    |          |        |
| PHL | Philippines               | <50%                    | 2013     | DHS    |          |        |
| RWA | Rwanda                    | >=50%                   | 2010     | DHS    |          |        |
| SLE | Sierra_Leone              | <50%                    | 2010     | MICS   | 2013     | DHS    |
| TCD | Chad                      | <50%                    | 2010     | MICS   |          |        |
| TGO | Togo                      | <50%                    | 2010     | MICS   | 2013     | DHS    |
| TJK | Tajikistan                | >=50%                   | 2012     | DHS    |          |        |
| UGA | Uganda                    | <50%                    | 2011     | DHS    |          |        |
| YEM | Yemen                     | <50%                    | 2013     | DHS    |          |        |
| ZMB | Zambia                    | <50%                    | 2013     | DHS    |          |        |
| ZWE | Zimbabwe                  | <50%                    | 2010     | DHS    | 2014     | MICS   |

**Fragile states - IMCI care-seeking for pneumonia**

| ISO | Country                   | Level of implementation             | Fragile state? |
|-----|---------------------------|-------------------------------------|----------------|
| ALB | Albania                   | Other                               | NO             |
| ARM | Armenia                   | Other                               | NO             |
| BDI | Burundi                   | High implementation in 3 components | YES            |
| BEN | Benin                     | Other                               | NO             |
| BFA | Burkina_Faso              | High implementation in 3 components | NO             |
| BGD | Bangladesh                | High implementation in 3 components | NO             |
| BIH | Bosnia_and_Herzegovina    | Other                               | YES            |
| BLR | Belarus                   | Other                               | NO             |
| BLZ | Belize                    | Other                               | NO             |
| BOL | Bolivia                   | High implementation in 3 components | NO             |
| BRA | Brazil                    | High implementation in 3 components | NO             |
| CAF | CAR                       | Other                               | YES            |
| CIV | Cote_dIvoire              | Other                               | NO             |
| CMR | Cameroon                  | Other                               | NO             |
| COD | Congo_Democratic_Republic | Other                               | YES            |
| COG | Congo_Brazzaville         | High implementation in 3 components | NO             |
| COL | Colombia                  | Other                               | NO             |
| COM | Comoros                   | High implementation in 3 components | YES            |
| CUB | Cuba                      | Other                               | NO             |
| DOM | Dominican_Republic        | Other                               | NO             |
| EGY | Egypt                     | High implementation in 3 components | NO             |
| ETH | Ethiopia                  | High implementation in 3 components | NO             |
| GAB | Gabon                     | Other                               | NO             |
| GHA | Ghana                     | Other                               | NO             |
| GIN | Guinea                    | Other                               | NO             |
| GMB | Gambia                    | Other                               | NO             |
| GTM | Guatemala                 | High implementation in 3 components | NO             |
| GUY | Guyana                    | High implementation in 3 components | NO             |
| HND | Honduras                  | Other                               | NO             |
| HTI | Haiti                     | High implementation in 3 components | YES            |
| IDN | Indonesia                 | High implementation in 3 components | NO             |
| IND | India                     | Other                               | NO             |
| IRQ | Iraq                      | Other                               | YES            |
| JAM | Jamaica                   | Other                               | NO             |
| JOR | Jordan                    | Other                               | NO             |
| KAZ | Kazakhstan                | High implementation in 3 components | NO             |
| KEN | Kenya                     | High implementation in 3 components | NO             |
| KGZ | Kyrgyzstan                | Other                               | NO             |
| KHM | Cambodia                  | High implementation in 3 components | NO             |
| LAO | Lao                       | Other                               | NO             |
| LBR | Liberia                   | High implementation in 3 components | YES            |
| LSO | Lesotho                   | Other                               | NO             |
| MDA | Moldova                   | High implementation in 3 components | NO             |
| MDG | Madagascar                | Other                               | YES            |
| MKD | Macedonia                 | Other                               | NO             |
| MLI | Mali                      | Other                               | YES            |
| MNE | Montenegro                | Other                               | NO             |
| MNG | Mongolia                  | Other                               | NO             |
| MOZ | Mozambique                | High implementation in 3 components | NO             |
| MRT | Mauritania                | Other                               | NO             |
| MWI | Malawi                    | High implementation in 3 components | NO             |
| NAM | Namibia                   | High implementation in 3 components | NO             |
| NER | Niger                     | High implementation in 3 components | NO             |
| NGA | Nigeria                   | Other                               | NO             |
| NIC | Nicaragua                 | High implementation in 3 components | NO             |
| NPL | Nepal                     | Other                               | NO             |
| PAK | Pakistan                  | Other                               | NO             |
| PER | Peru                      | Other                               | NO             |
| PHL | Philippines               | Other                               | NO             |
| PIL | Palestinians_in_Lebanon   | Other                               | NO             |
| PSE | State_of_Palestine        | Other                               | NO             |
| RWA | Rwanda                    | High implementation in 3 components | NO             |
| SEN | Senegal                   | High implementation in 3 components | NO             |
| SLE | Sierra_Leone              | High implementation in 3 components | YES            |
| SRB | Serbia                    | Other                               | NO             |
| SUR | Suriname                  | Other                               | NO             |
| SWZ | Swaziland                 | Other                               | NO             |
| TCD | Chad                      | Other                               | YES            |
| TGO | Togo                      | Other                               | YES            |
| TJK | Tajikistan                | High implementation in 3 components | NO             |
| TUR | Turkey                    | Other                               | NO             |
| TZA | Tanzania                  | High implementation in 3 components | NO             |
| UGA | Uganda                    | High implementation in 3 components | NO             |
| UKR | Ukraine                   | Other                               | NO             |
| UZB | Uzbekistan                | Other                               | NO             |
| VNM | Vietnam                   | Other                               | NO             |
| YEM | Yemen                     | Other                               | YES            |
| ZMB | Zambia                    | High implementation in 3 components | NO             |
| ZWE | Zimbabwe                  | High implementation in 3 components | YES            |

From the 33 fragile states listed in this document: <http://siteresources.worldbank.org/EXTLICUS/Resources/511777-1269623894864/FY15FragileSituationList.pdf>, we have information on 15, almost a half of them. Also, from the 79 countries included, 15 are from fragile states (19%)

### Fragile states - IMCI care-seeking for any disease

| ISO | Country                   | Level of implementation             | Fragile State? |
|-----|---------------------------|-------------------------------------|----------------|
| ALB | Albania                   | Other                               | NO             |
| ARM | Armenia                   | Other                               | NO             |
| BDI | Burundi                   | High implementation in 3 components | YES            |
| BEN | Benin                     | Other                               | NO             |
| BFA | Burkina_Faso              | High implementation in 3 components | NO             |
| BGD | Bangladesh                | High implementation in 3 components | NO             |
| BOL | Bolivia                   | High implementation in 3 components | NO             |
| BRA | Brazil                    | High implementation in 3 components | NO             |
| CAF | CAR                       | Other                               | YES            |
| CIV | Cote_dIvoire              | Other                               | NO             |
| CMR | Cameroon                  | Other                               | NO             |
| COD | Congo_Democratic_Republic | Other                               | YES            |
| COG | Congo_Brazzaville         | High implementation in 3 components | NO             |
| COL | Colombia                  | Other                               | NO             |
| COM | Comoros                   | High implementation in 3 components | YES            |
| DOM | Dominican_Republic        | Other                               | NO             |
| EGY | Egypt                     | High implementation in 3 components | NO             |
| ETH | Ethiopia                  | High implementation in 3 components | NO             |
| GAB | Gabon                     | Other                               | NO             |
| GHA | Ghana                     | Other                               | NO             |
| GIN | Guinea                    | Other                               | NO             |
| GMB | Gambia                    | Other                               | NO             |
| GTM | Guatemala                 | High implementation in 3 components | NO             |
| GUY | Guyana                    | High implementation in 3 components | NO             |
| HND | Honduras                  | Other                               | NO             |
| HTI | Haiti                     | High implementation in 3 components | YES            |
| IDN | Indonesia                 | High implementation in 3 components | NO             |
| IND | India                     | Other                               | NO             |
| JOR | Jordan                    | Other                               | NO             |
| KAZ | Kazakhstan                | High implementation in 3 components | NO             |
| KEN | Kenya                     | High implementation in 3 components | NO             |
| KGZ | Kyrgyzstan                | Other                               | NO             |
| KHM | Cambodia                  | High implementation in 3 components | NO             |
| LBR | Liberia                   | High implementation in 3 components | YES            |
| LSO | Lesotho                   | Other                               | NO             |
| MDA | Moldova                   | High implementation in 3 components | NO             |
| MDG | Madagascar                | Other                               | YES            |
| MLI | Mali                      | Other                               | YES            |
| MOZ | Mozambique                | High implementation in 3 components | NO             |
| MWI | Malawi                    | High implementation in 3 components | NO             |
| NAM | Namibia                   | High implementation in 3 components | NO             |
| NER | Niger                     | High implementation in 3 components | NO             |
| NGA | Nigeria                   | Other                               | NO             |
| NIC | Nicaragua                 | High implementation in 3 components | NO             |
| NPL | Nepal                     | Other                               | NO             |
| PAK | Pakistan                  | Other                               | NO             |
| PER | Peru                      | Other                               | NO             |
| PHL | Philippines               | Other                               | NO             |
| RWA | Rwanda                    | High implementation in 3 components | NO             |
| SEN | Senegal                   | High implementation in 3 components | NO             |
| SLE | Sierra_Leone              | High implementation in 3 components | YES            |
| SWZ | Swaziland                 | Other                               | NO             |
| TCD | Chad                      | Other                               | YES            |
| TGO | Togo                      | Other                               | YES            |
| TJK | Tajikistan                | High implementation in 3 components | NO             |
| TUR | Turkey                    | Other                               | NO             |
| TZA | Tanzania                  | High implementation in 3 components | NO             |
| UGA | Uganda                    | High implementation in 3 components | NO             |
| UZB | Uzbekistan                | Other                               | NO             |
| VNM | Vietnam                   | Other                               | NO             |
| YEM | Yemen                     | Other                               | YES            |
| ZMB | Zambia                    | High implementation in 3 components | NO             |
| ZWE | Zimbabwe                  | High implementation in 3 components | YES            |

From the 33 fragile states listed in this document: <http://siteresources.worldbank.org/EXTLICUS/Resources/511777-1269623894864/FY15FragileSituationList.pdf>, we have information on 13, almost a half of them. Also, from the 63 countries included, 13 are from fragile states (21%)

**Fragile states - iCCM care-seeking for pneumonia**

| ISO | Country                   | Level of implementation | Fragile State? |
|-----|---------------------------|-------------------------|----------------|
| ARM | Armenia                   | >=50%                   | NO             |
| BDI | Burundi                   | <50%                    | YES            |
| BEN | Benin                     | >=50%                   | NO             |
| BFA | Burkina_Faso              | >=50%                   | NO             |
| BGD | Bangladesh                | >=50%                   | NO             |
| CIV | Cote_divoire              | >=50%                   | NO             |
| CMR | Cameroon                  | <50%                    | NO             |
| COD | Congo_Democratic_Republic | >=50%                   | YES            |
| COG | Congo_Brazzaville         | <50%                    | NO             |
| COL | Colombia                  | <50%                    | NO             |
| COM | Comoros                   | <50%                    | YES            |
| CUB | Cuba                      | >=50%                   | NO             |
| DOM | Dominican_Republic        | <50%                    | NO             |
| EGY | Egypt                     | <50%                    | NO             |
| ETH | Ethiopia                  | >=50%                   | NO             |
| GHA | Ghana                     | >=50%                   | NO             |
| GIN | Guinea                    | >=50%                   | NO             |
| GMB | Gambia                    | >=50%                   | NO             |
| HTI | Haiti                     | <50%                    | YES            |
| IDN | Indonesia                 | <50%                    | NO             |
| KHM | Cambodia                  | <50%                    | NO             |
| LAO | Lao                       | <50%                    | NO             |
| LBR | Liberia                   | <50%                    | YES            |
| MLI | Mali                      | >=50%                   | YES            |
| MOZ | Mozambique                | >=50%                   | NO             |
| MWI | Malawi                    | >=50%                   | YES            |
| NER | Niger                     | >=50%                   | NO             |
| NGA | Nigeria                   | <50%                    | NO             |
| NPL | Nepal                     | >=50%                   | NO             |
| PAK | Pakistan                  | <50%                    | NO             |
| PHL | Philippines               | <50%                    | NO             |
| RWA | Rwanda                    | >=50%                   | NO             |
| SLE | Sierra_Leone              | <50%                    | YES            |
| TCD | Chad                      | <50%                    | YES            |
| TGO | Togo                      | <50%                    | YES            |
| TJK | Tajikistan                | >=50%                   | NO             |
| UGA | Uganda                    | <50%                    | NO             |
| YEM | Yemen                     | <50%                    | YES            |
| ZMB | Zambia                    | <50%                    | NO             |
| ZWE | Zimbabwe                  | <50%                    | YES            |

From the 33 fragile states listed in this document: <http://siteresources.worldbank.org/EXTLICUS/Resources/511777-1269623894864/FY15FragileSituationList.pdf>, we have information on 12, almost a half of them. Also, from the 40 countries included, 12 are from fragile states (30%)
